# Supplementary material for: Towards understanding the color change of 1-butyl-3-methylimidazolium bis(trifluoromethylsulfonyl)imide during gamma irradiation: an experimental and theoretical study
Source: Royal Society of Chemistry journal article supplement (doi:10.1039/c4cp01905a), 2014-01-01
Supplement: c4cp01905a1.pdf [file c4cp01905a1.pdf]

Supplementary Material (ESI) for Physical Chemistry Chemical Physics

**Towards understanding the color change of  
1-butyl-3-methylimidazolium bis(trifluoromethylsulfonyl)imide  
during gamma irradiation: an experimental and theoretical  
study**

Shuojue Wang,<sup>a</sup> Junzi Liu,<sup>b</sup> Liyong Yuan,<sup>c</sup> Zhenpeng Cui,<sup>a</sup> Jing Peng,<sup>a</sup> Jiuqiang Li,<sup>a</sup>  
Maolin Zhai<sup>a\*</sup> and Wenjian Liu<sup>b\*</sup>

<sup>a</sup> *Beijing National Laboratory for Molecular Sciences, Department of Applied Chemistry, College of Chemistry and Molecular Engineering, Peking University, 100871, Beijing, P. R. China*

<sup>b</sup> *Beijing National Laboratory for Molecular Sciences, Institute of Theoretical and Computational Chemistry, State Key Laboratory of Rare Earth Materials Chemistry and Applications, College of Chemistry and Molecular Engineering, and Center for Computational Science and Engineering, Peking University, 100871, Beijing, P. R. China*

<sup>c</sup> *Key laboratory of Nuclear Radiation and Nuclear Energy Technology and Key Laboratory for Biomedical Effects of Nanomaterials & Nanosafety, Institute of High Energy Physics, Chinese Academy of Sciences, 100049, Beijing, P. R. China.*

---

\*Corresponding author: Maolin Zhai, Tel/Fax: 86-10-62753794, E-mail: mlzhai@pku.edu.cn; Wenjian Liu, Tel/Fax: 86-10-62756717, E-mail: liuwjbd@gmail.com

ATR-IR and  $^1\text{H}$  NMR spectra of [BMIm][NTf<sub>2</sub>] before and after irradiation showed no discernible changes at a dose of 400 kGy (Fig. S1), indicating that less than 1% of [BMIm][NTf<sub>2</sub>] underwent radiolysis.<sup>1,2</sup> The same phenomena were found for [BMPyrr][NTf<sub>2</sub>] by comparison of corresponding ATR-IR and  $^1\text{H}$  NMR spectra recorded before and after irradiation (Fig. S2). Consequently, it is concluded that both aromatic and aliphatic RTILs are relatively radiation resistant.

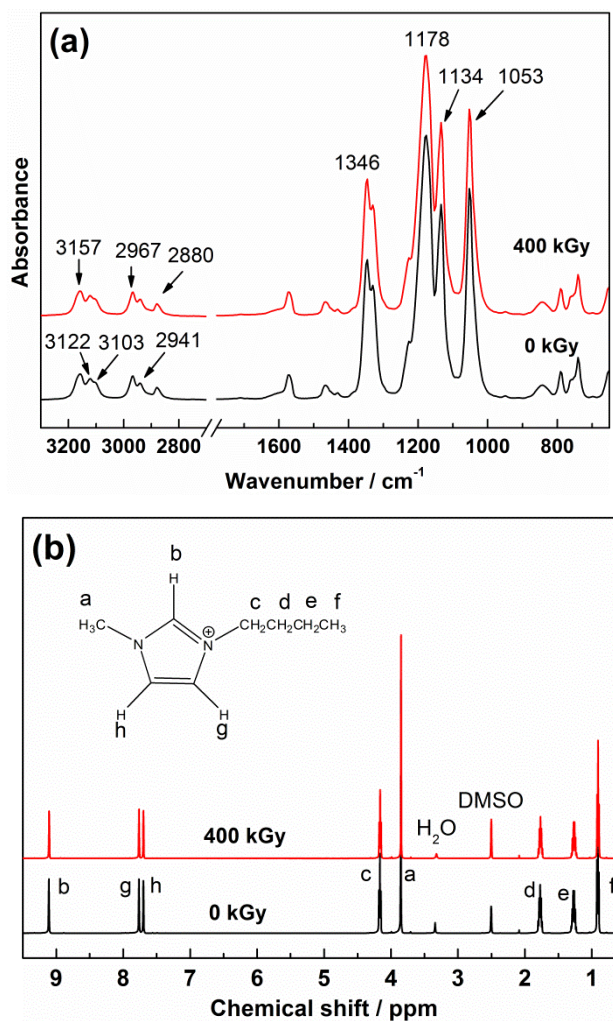

**Fig. S1** (a) ATR-IR spectra and (b)  $^1\text{H}$  NMR spectra of [BMIm][NTf<sub>2</sub>] before and after  $\gamma$ -irradiation at 400 kGy under argon atmosphere.

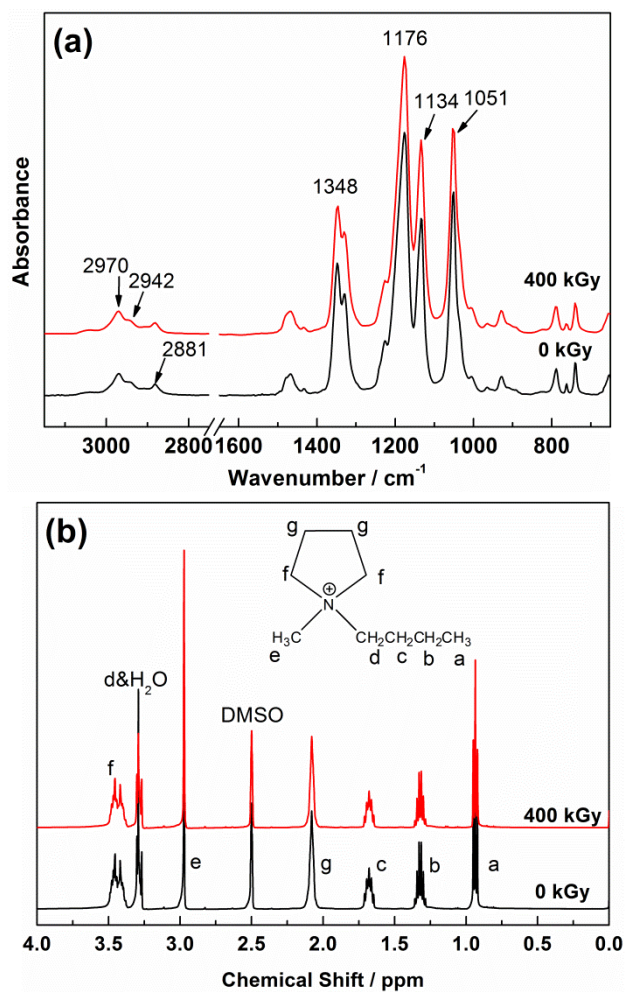

**Fig. S2** (a) ATR-IR spectra and (b) <sup>1</sup>H NMR spectra of [BMPyrr][NTf<sub>2</sub>] before and after  $\gamma$ -irradiation at 400 kGy under argon atmosphere.

Owing to oxidization of “colored products” by  $\text{HNO}_3$ ,<sup>3,4</sup> during  $\text{HNO}_3$  treatment the lightening of the irradiated  $[\text{BMIm}][\text{NTf}_2]$  was observed (Fig. S3a). The intensity of broad absorption band decreased markedly after  $\text{HNO}_3$  oxidation, accompanied by the disappearance of absorption peak at 290 nm. Decoloration of irradiated  $[\text{BMPyrr}][\text{NTf}_2]$  can also be realized after  $\text{HNO}_3$  treatment (Fig. S3b).  $[\text{BMIm}][\text{NTf}_2]$  and  $[\text{BMPyrr}][\text{NTf}_2]$  became slightly cloudy after contacting with  $\text{HNO}_3$  aqueous solution, which originates from formation of emulsion when hydrophobic RTILs are in contact with water.<sup>5</sup>

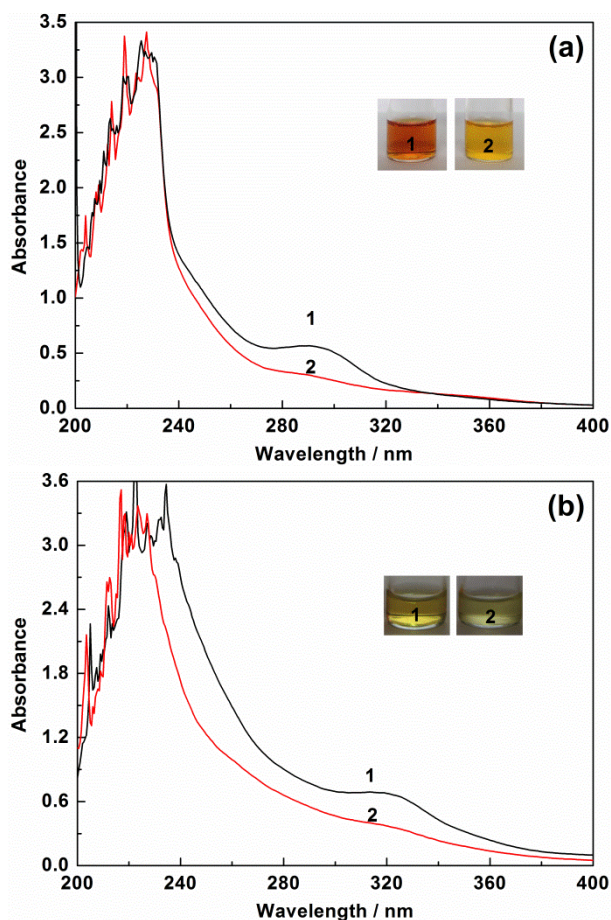

**Fig. S3** (a) UV-Vis spectra of irradiated  $[\text{BMIm}][\text{NTf}_2]$  with a dilution factor of 300 before (1) and after (2) contacting with  $\text{HNO}_3$  solution ( $3 \text{ mol L}^{-1}$ ) for 16 h. (b) UV-Vis spectra of irradiated  $[\text{BMPyrr}][\text{NTf}_2]$  with a dilution factor of 25 before (1) and after (2) contacting with  $\text{HNO}_3$  solution ( $3 \text{ mol L}^{-1}$ ) for 16 h. Inset of each figure shows the color of corresponding samples.

$^1\text{H}$  NMR spectrum of irradiated [BMIm][NTf<sub>2</sub>] after HNO<sub>3</sub> treatment was similar to that of [BMIm][NTf<sub>2</sub>] before decoloration (Fig. S4), indicating that HNO<sub>3</sub> does not oxidize [BMIm][NTf<sub>2</sub>] itself. After HNO<sub>3</sub> treatment, the peak of water broadens and shifts to lower field in the  $^1\text{H}$  NMR spectrum of [BMIm][NTf<sub>2</sub>], which is ascribed to the addition of nitric acid.<sup>6</sup> After O<sub>3</sub> treatment for decoloration, some small peaks were observed in the  $^1\text{H}$  NMR spectrum. Further study reveals that these peaks originate from slight destruction of [BMIm][NTf<sub>2</sub>] itself rather than destruction of radiolysis products during O<sub>3</sub> oxidation.

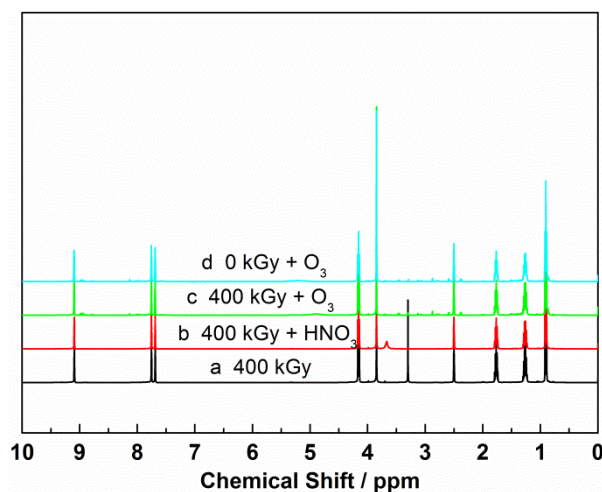

**Fig. S4**  $^1\text{H}$  NMR spectra of [BMIm][NTf<sub>2</sub>] (a) after irradiation at 400 kGy; (b) after irradiation at 400 kGy and HNO<sub>3</sub> treatment; (c) after irradiation at 400 kGy and O<sub>3</sub> treatment; (d) after O<sub>3</sub> treatment.

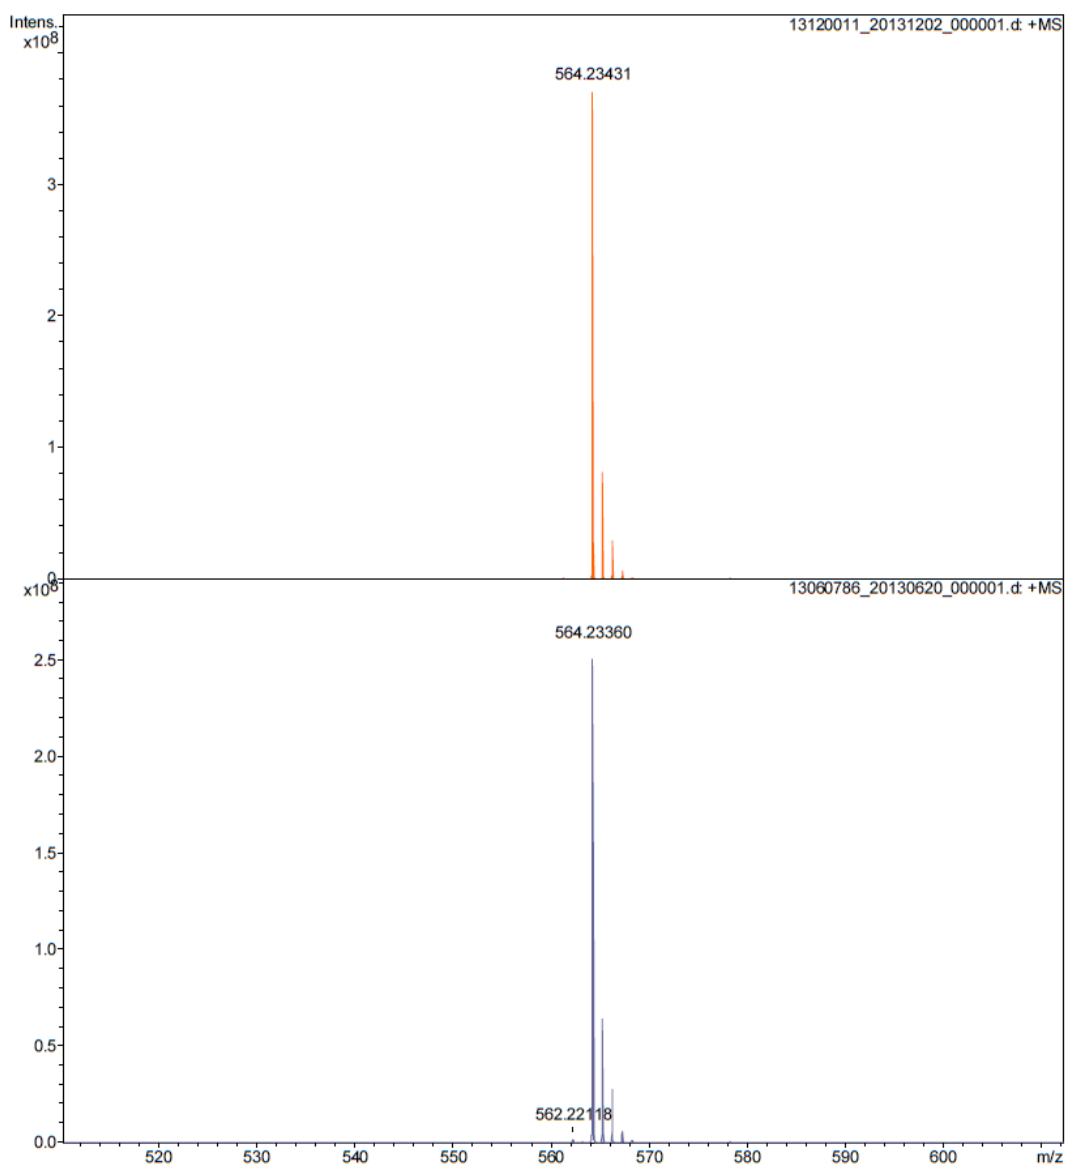

**Fig. S5** ESI-MS spectra of [BMPyrr][NTf<sub>2</sub>] before (top) and after (bottom) irradiation at 400 kGy in the range of  $m/z = 510$ – $612$ . The peak at  $m/z = 562$  attributed to the formation of double bonds appears in the ESI-MS spectrum of irradiated [BMPyrr][NTf<sub>2</sub>].

[BMIm][NTf<sub>2</sub>] samples at different concentrations before and after irradiation at 400 kGy were observed when a beam of light passes through them. Fig. S6 exhibits the typical photographs. Un-irradiated [BMIm][NTf<sub>2</sub>] shows almost no visible path of light, while obvious Tyndall effect is observed for [BMIm][NTf<sub>2</sub>] after irradiation.

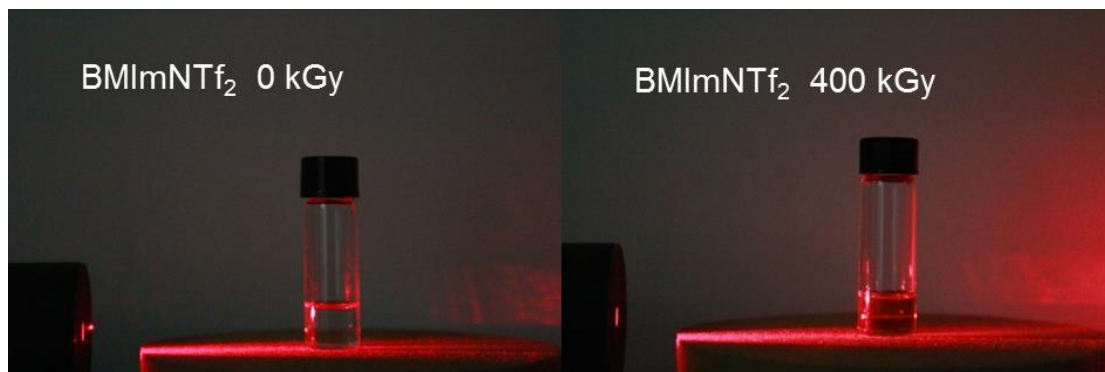

**Fig. S6** Typical photographs of [BMIm][NTf<sub>2</sub>] before and after irradiation at 400 kGy when a beam of light (632 nm) passes through the RTIL samples.

## References

- 1 D. Allen, G. Baston, A. E. Bradley, T. Gorman, A. Haile, I. Hamblett, J. E. Hatter, M. J. F. Healey, B. Hodgson, R. Lewin, K. V. Lovell, B. Newton, W. R. Pitner, D. W. Rooney, D. Sanders, K. R. Seddon, H. E. Sims and R. C. Thied, *Green. Chem.*, 2002, **4**, 152-158.
- 2 L. Berthon, S. I. Nikitenko, I. Bisel, C. Berthon, M. Faucon, B. Saucerotte, N. Zorz and P. Moisy, *Dalton Trans.*, 2006, 2526-2534.
- 3 L. Y. Yuan, J. Peng, L. Xu, M. L. Zhai, J. Q. Li and G. S. Wei, *Radiat. Phys. Chem.*, 2009, **78**, 1133-1136.
- 4 L. Y. Yuan, J. Peng, M. L. Zhai, J. Q. Li and G. S. Wei, *Radiat. Phys. Chem.*, 2009, **78**, 737-739.
- 5 S. E. Howett, J. M. Joseph, J. J. Noel and J. C. Wren, *J. Colloid Interf. Sci.*, 2011, **361**, 338-350.
- 6 L. Y. Yuan, J. Peng, L. Xu, M. L. Zhai, J. Q. Li and G. S. Wei, *Dalton Trans.*, 2008, 6358-6360.
